# Supplementary material
Source: PubMed Central journal article supplement (PMC3280198)
Supplement: NIHMS354842-supplement-Supplemental_Table.pdf [file NIHMS354842-supplement-Supplemental_Table.pdf]

Supplementary information S1 (table) | **Human diseases of the epidermis**

| Molecular target*                     | Disease                                                                                                          | Phenotype                                                                                                                                     |
|---------------------------------------|------------------------------------------------------------------------------------------------------------------|-----------------------------------------------------------------------------------------------------------------------------------------------|
| <b>Gap junctions</b>                  |                                                                                                                  |                                                                                                                                               |
| CX26                                  | Keratitis ichthyosis deafness syndrome and hystrix-like ichthyosis deafness syndrome <sup>1</sup>                | Vascularizing keratitis; progressive erythrokeratoderma; sensorineural hearing loss                                                           |
|                                       | Vohwinkel's syndrome (keratoderma hereditaria mutilans) <sup>2</sup>                                             | Keratoderma of palmoplantar surfaces; circumferential hyperkeratosis of digits leading to autoamputation; moderate sensorineural hearing loss |
|                                       | Bart–Pumphrey syndrome <sup>3</sup>                                                                              | Hyperkeratosis of knuckle pads; sensorineural hearing loss                                                                                    |
| CX30                                  | Clouston syndrome (hidrotic ectodermal dysplasia) <sup>4</sup>                                                   | Palmoplantar hyperkeratosis; hair defects (partial to total alopecia); nail deformities                                                       |
| CX30.3, CX31                          | Erythrokeratoderma variabilis <sup>5,6</sup>                                                                     | Local or diffuse hyperkeratosis; migratory erythematous patches                                                                               |
| <b>Adherens junctions</b>             |                                                                                                                  |                                                                                                                                               |
| P-cadherin (encoded by <i>CDH3</i> )  | Hypotrichosis with juvenile macular dystrophy <sup>7</sup>                                                       | Hair loss; progressive macular degeneration and early blindness                                                                               |
|                                       | Ectodermal dysplasia, ectrodactyly, macular degeneration syndrome <sup>8</sup>                                   | Hypotrichosis with partial adontia; absence deformities and syndactyly; atrophy of retinal pigment epithelium                                 |
| <b>Keratin intermediate filaments</b> |                                                                                                                  |                                                                                                                                               |
| K4, K13                               | White sponge nevus <sup>9,10</sup>                                                                               | Spongy white plaques, often on buccal mucosa                                                                                                  |
| K9                                    | Epidermolytic palmoplantar keratoderma <sup>11</sup>                                                             | Epidermolysis and hyperkeratosis of palms and soles                                                                                           |
| K6, K16, K17                          | Pachyonychia congenita <sup>12,13</sup>                                                                          | Painful blisters on hands and feet; thickened nails; hyperkeratosis of hair follicles; leukokeratosis of oral mucosa                          |
| K2e                                   | Ichthyosis bullosa of Siemens <sup>14,15</sup>                                                                   | Bullous ichthyosis without erythroderma; epidermolysis limited to upper suprabasal layers                                                     |
| K1, K10                               | Bullous congenital ichthyosis erythroderma (epidermolytic hyperkeratosis) <sup>16–18</sup>                       | Generalized erythema; erosions and blisters owing to fragility of suprabasal keratinocytes                                                    |
| K5, K14                               | Epidermolysis bullosa simplex <sup>19</sup>                                                                      | Skin blistering from fragility of basal keratinocytes                                                                                         |
| <b>Desmosomes</b>                     |                                                                                                                  |                                                                                                                                               |
| DSG1                                  | Bullous impetigo <sup>20</sup>                                                                                   | Epidermal blisters at the granular layer caused by a bacterial protease                                                                       |
|                                       | Staphylococcal scalded skin syndrome <sup>20</sup>                                                               |                                                                                                                                               |
|                                       | Pemphigus foliaceus <sup>21</sup>                                                                                | Epidermal blisters at the granular layer caused by autoantibodies                                                                             |
| DSG3                                  | Pemphigus vulgaris <sup>22</sup>                                                                                 | Epidermal blisters at the basal–suprabasal cell interface caused by autoantibodies                                                            |
| DSG4                                  | Hypotrichosis <sup>23</sup>                                                                                      | Sparse, fragile hair with abnormal hair follicles; epidermal hyperproliferation                                                               |
| DSC3                                  | Hypotrichosis with skin vesicles <sup>24</sup>                                                                   | Sparse, fragile hair with normal hair follicles; recurrent skin vesicles                                                                      |
| DSC2                                  | Arrhythmogenic right ventricular cardiomyopathy with mild palmoplantar keratoderma and woolly hair <sup>25</sup> | Ventricular arrhythmias with fibro-fatty replacement of heart tissue; thickening of palms and soles; tightly coiled hair                      |
| DP, DSG1                              | Striate palmoplantar keratoderma <sup>26–28</sup>                                                                | Linear and focal hyperkeratosis of palms and soles                                                                                            |
| DP                                    | Carvajal syndrome <sup>29</sup>                                                                                  | Epidermolytic palmoplantar keratoderma with woolly hair and dilated cardiomyopathy                                                            |
|                                       | Lethal acantholytic epidermolysis bullosa <sup>30</sup>                                                          | Acantholysis and shedding of skin at birth, leading to early death                                                                            |
| PKP1                                  | Ectodermal dysplasia-skin fragility syndrome <sup>31</sup>                                                       | Skin fragility; plantar keratoderma; nail dystrophy; alopecia                                                                                 |
| PG                                    | Naxos disease <sup>32</sup>                                                                                      | Woolly hair; palmoplantar keratoderma; arrhythmogenic right ventricular cardiomyopathy                                                        |
|                                       | Lethal congenital epidermolysis bullosa <sup>33</sup>                                                            | Lethal epidermal blistering at birth                                                                                                          |
| <b>Hemidesmosomes</b>                 |                                                                                                                  |                                                                                                                                               |
| Laminins, integrins, BPAG2            | Junctional epidermolysis bullosa <sup>34–37</sup>                                                                | Generalized blistering at dermal–epidermal junction due to either congenital mutation or acquired autoantibodies                              |
| BPAG1e                                | Epidermolysis bullosa simplex <sup>38</sup>                                                                      | Trauma-induced epidermal blisters and episodic limb numbness                                                                                  |
| Plectin                               | Epidermolysis bullosa simplex with muscular dystrophy <sup>55</sup>                                              | Epidermal bullous disease coupled with a severe, slowly progressive, muscle atrophy                                                           |
| BPAG2                                 | Bullous pemphigoid <sup>39</sup>                                                                                 | Fluid-filled subepidermal blisters with derroofing of epidermis caused by autoantibodies                                                      |

| Molecular target*                                       | Disease                                                               | Phenotype                                                                                                                                     |
|---------------------------------------------------------|-----------------------------------------------------------------------|-----------------------------------------------------------------------------------------------------------------------------------------------|
| <b>Stratum corneum</b>                                  |                                                                       |                                                                                                                                               |
| ABCA12 (lipid transport)                                | Harlequin ichthyosis <sup>40,41</sup>                                 | Hard, thickened skin with fissures                                                                                                            |
| Filaggrin                                               | Ichthyosis vulgaris <sup>42</sup>                                     | Dry skin; mild hyperkeratosis                                                                                                                 |
| CDSN                                                    | Hypotrichosis simplex of scalp <sup>43</sup>                          | Childhood-onset loss of hair                                                                                                                  |
|                                                         | Generalized peeling skin syndrome <sup>44</sup>                       | Peeling of the skin and itching                                                                                                               |
| SPINK5 (also known as LEKT1; serine protease inhibitor) | Netherton syndrome <sup>45</sup>                                      | Exfoliative erythroderma; hair abnormalities; atopic manifestations                                                                           |
| TGase 1                                                 | Lamellar ichthyosis <sup>46–48</sup>                                  | Newborns covered with colloid membrane that is later shed; erythema with white scales; hyperkeratosis of palms and soles                      |
| Loricrin                                                | Vohwinkel's syndrome (keratoderma hereditaria mutilans) <sup>49</sup> | Keratoderma of palmoplantar surfaces; circumferential hyperkeratosis of digits leading to autoamputation; moderate sensorineural hearing loss |
|                                                         | Progressive symmetric erythrokeratoderma <sup>50</sup>                | Hyperpigmented, hyperkeratotic plaques with symmetrical growth                                                                                |
| <b>Other</b>                                            |                                                                       |                                                                                                                                               |
| ATP2C1 (calcium pump)                                   | Hailey–Hailey disease <sup>51</sup>                                   | Outbreaks of rashes and blisters, usually in skin folds                                                                                       |
| ATP2A2 (calcium pump)                                   | Darier's disease <sup>52</sup>                                        | Acantholysis; abnormal keratinization; greasy, hyperkeratotic papules                                                                         |
| Collagen VII                                            | Dystrophic epidermolysis bullosa <sup>53</sup>                        | Severe blistering with atrophic scarring                                                                                                      |
| Kindlin 1                                               | Kindler syndrome <sup>54</sup>                                        | Skin atrophy with blistering at dermal–epidermal junction                                                                                     |

ABCA12, ATP-binding cassette, sub-family A, member 12; ATP2A2, sarcoplasmic/endoplasmic reticulum calcium ATPase 2; ATP2C1, calcium-transporting ATPase type 2C member 1; BPAG, bullous pemphigoid antigen; CDH3, cadherin 3; CDSN, corneodesmosin; CX, connexin; DP, desmoplakin; DSC, desmocollin; DSG, desmoglein; K, keratin; PG, plakoglobin; PKP1, plakophilin 1; TGase 1, transglutaminase 1. \*Listed molecular targets are affected by gene mutation in these diseases unless otherwise specified.

- Richard, G. *et al.* Missense mutations in GJB2 encoding connexin-26 cause the ectodermal dysplasia keratitis-ichthyosis-deafness syndrome. *Am. J. Hum. Genet.* **70**, 1341–1348 (2002).
- Maestrini, E. *et al.* A missense mutation in connexin26, D66H, causes mutilating keratoderma with sensorineural deafness (Vohwinkel's syndrome) in three unrelated families. *Human Mol. Genet.* **8**, 1237–1243 (1999).
- Richard, G., Brown, N., Ishida-Yamamoto, A. & Krol, A. Expanding the phenotypic spectrum of Cx26 disorders: Bart-Pumphrey syndrome is caused by a novel missense mutation in GJB2. *J. Invest. Dermatol.* **123**, 856–863 (2004).
- Lamartine, J. *et al.* Mutations in GJB6 cause hidrotic ectodermal dysplasia. *Nature Genet.* **26**, 142–144 (2000).
- Richard, G. *et al.* Mutations in the human connexin gene GJB3 cause erythrokeratoderma variabilis. *Nature Genet.* **20**, 366–369 (1998).
- Macari, F. *et al.* Mutation in the gene for connexin 30.3 in a family with erythrokeratoderma variabilis. *Am. J. Hum. Genet.* **67**, 1296–1301 (2000).
- Sprecher, E. *et al.* Hypotrichosis with juvenile macular dystrophy is caused by a mutation in CDH3, encoding P-cadherin. *Nature Genet.* **29**, 134–136 (2001).
- Kjaer, K. W. *et al.* Distinct CDH3 mutations cause ectodermal dysplasia, ectrodactyly, macular dystrophy (EEM syndrome). *J. Med. Genet.* **42**, 292–298 (2005).
- Richard, G., De Laurenzi, V., Didona, B., Bale, S. J. & Compton, J. G. Keratin 13 point mutation underlies the hereditary mucosal epithelial disorder white sponge nevus. *Nature Genet.* **11**, 453–455 (1995).
- Rugg, E. L. *et al.* A mutation in the mucosal keratin K4 is associated with oral white sponge nevus. *Nature Genet.* **11**, 450–452 (1995).
- Reis, A. *et al.* Keratin 9 gene mutations in epidermolytic palmoplantar keratoderma (EPPK). *Nature Genet.* **6**, 174–179 (1994).
- McLean, W. H. *et al.* Keratin 16 and keratin 17 mutations cause pachyonychia congenita. *Nature Genet.* **9**, 273–278 (1995).
- Bowden, P. E. *et al.* Mutation of a type II keratin gene (K6a) in pachyonychia congenita. *Nature Genet.* **10**, 363–365 (1995).
- Steijlen, P. M. *et al.* Genetic linkage of the keratin type II gene cluster with ichthyosis bullosa of Siemens and with autosomal dominant ichthyosis exfoliativa. *J. Invest. Dermatol.* **103**, 282–285 (1994).
- Kremer, H. *et al.* Ichthyosis bullosa of Siemens is caused by mutations in the keratin 2e gene. *J. Invest. Dermatol.* **103**, 286–289 (1994).
- Chipev, C. C. *et al.* A leucine–proline mutation in the H1 subdomain of keratin 1 causes epidermolytic hyperkeratosis. *Cell* **70**, 821–828 (1992).
- Cheng, J. *et al.* The genetic basis of epidermolytic hyperkeratosis: a disorder of differentiation-specific epidermal keratin genes. *Cell* **70**, 811–819 (1992).
- Rothnagel, J. A. *et al.* Mutations in the rod domains of keratins 1 and 10 in epidermolytic hyperkeratosis. *Science* **257**, 1128–1130 (1992).
- Bonifas, J. M., Rothman, A. L. & Epstein, E. H., Jr Epidermolysis bullosa simplex: evidence in two families for keratin gene abnormalities. *Science* **254**, 1202–1205 (1991).
- Amagai, M., Matsuyoshi, N., Wang, Z. H., Andl, C. & Stanley, J. R. Toxin in bullous impetigo and staphylococcal scalded-skin syndrome targets desmoglein 1. *Nature Med.* **6**, 1275–1277 (2000).
- Koulu, L., Kusumi, A., Steinberg, M. S., Klaus-Kovtun, V. & Stanley, J. R. Human autoantibodies against a desmosomal core protein in pemphigus foliaceus. *J. Exp. Med.* **160**, 1509–1518 (1984).
- Amagai, M., Klaus-Kovtun, V. & Stanley, J. R. Autoantibodies against a novel epithelial cadherin in pemphigus vulgaris, a disease of cell adhesion. *Cell* **67**, 869–877 (1991).
- Kljuic, A. *et al.* Desmoglein 4 in hair follicle differentiation and epidermal adhesion. Evidence from inherited hypotrichosis and acquired pemphigus vulgaris. *Cell* **113**, 249–260 (2003).
- Ayub, M. *et al.* A homozygous nonsense mutation in the human desmocollin-3 (DSC3) gene underlies hereditary hypotrichosis and recurrent skin vesicles. *Am. J. Hum. Genet.* **85**, 515–520 (2009).
- Simpson, M. A. *et al.* Homozygous mutation of desmocollin-2 in arrhythmogenic right ventricular cardiomyopathy with mild palmoplantar keratoderma and woolly hair. *Cardiology* **113**, 28–34 (2009).
- Armstrong, D. K. B. *et al.* Haploinsufficiency of desmoplakin causes a striate subtype of palmoplantar keratoderma. *Hum. Mol. Genet.* **8**, 143–148 (1999).
- Rickman, L. *et al.* N-terminal deletion in a desmosomal cadherin causes the autosomal dominant skin disease striate palmoplantar keratoderma. *Hum. Mol. Genet.* **8**, 971–976 (1999).
- Norgett, E. E. *et al.* Recessive mutation in desmoplakin disrupts desmoplakin-intermediate filament interactions and causes dilated cardiomyopathy, woolly hair and keratoderma. *Hum. Mol. Genet.* **9**, 2761–2766 (2000).
- Carvajal-Huerta, L. Epidermolytic palmoplantar keratoderma with woolly hair and dilated cardiomyopathy. *J. Am. Acad. Dermatol.* **39**, 418–421 (1998).
- Jonkman, M. F. *et al.* Loss of desmoplakin tail causes lethal acantholytic epidermolysis bullosa. *Am. J. Hum. Genet.* **77**, 653–660 (2005).
- McGrath, J. A. *et al.* Mutations in the plakophilin 1 gene result in ectodermal dysplasia/skin fragility syndrome. *Nature Genet.* **17**, 240–244 (1997).
- McKoy, G. *et al.* Identification of a deletion in plakoglobin in arrhythmogenic right ventricular cardiomyopathy with palmoplantar keratoderma and woolly hair (Naxos disease). *Lancet* **355**, 2119–2124 (2000).
- Pigors, M. *et al.* Lack of plakoglobin leads to lethal congenital epidermolysis bullosa: a novel clinicogenetic entity. *Hum. Mol. Genet.* **20**, 1811–1819 (2011).
- Aberdam, D. *et al.* Herlitz's junctional epidermolysis bullosa is linked to mutations in the gene (LAMC2) for the  $\gamma 2$  subunit of nectin/kalinin (laminin-5). *Nature Genet.* **6**, 299–304 (1994).
- Pulkkinen, L. *et al.* Mutations in the  $\gamma 2$  chain gene (LAMC2) of kalinin/laminin 5 in the junctional forms of epidermolysis bullosa. *Nature Genet.* **6**, 293–298 (1994).
- Gil, S. G., Brown, T. A., Ryan, M. C. & Carter, W. G. Junctional epidermolysis bullosis: defects in expression of epiligrin/nectin/kalinin and integrin beta 4 that inhibit hemidesmosome formation. *J. Invest. Dermatol.* **103**, 315–385 (1994).

37. McGrath, J. A. *et al.* Mutations in the 180-kD bullous pemphigoid antigen (BPAG2), a hemidesmosomal transmembrane collagen (COL17A1), in generalized atrophic benign epidermolysis bullosa. *Nature Genet.* **11**, 83–86 (1995).
38. Groves, R. W. *et al.* A homozygous nonsense mutation within the dystonin gene coding for the coiled-coil domain of the epithelial isoform of BPAG1 underlies a new subtype of autosomal recessive epidermolysis bullosa simplex. *J. Invest. Dermatol.* **130**, 1551–1557 (2010).
39. Li, K. H. *et al.* Genomic organization of collagenous domains and chromosomal assignment of human 180-kDa bullous pemphigoid antigen-2, a novel collagen of stratified squamous epithelium. *J. Biol. Chem.* **266**, 24064–24069 (1991).
40. Annilo, T. *et al.* Identification and characterization of a novel ABCA subfamily member, ABCA12, located in the lamellar ichthyosis region on 2q34. *Cytogenet. Genome Res.* **98**, 169–176 (2002).
41. Kelsell, D. P. *et al.* Mutations in ABCA12 underlie the severe congenital skin disease harlequin ichthyosis. *Am. J. Hum. Genet.* **76**, 794–803 (2005).
42. Sybert, V. P., Dale, B. A. & Holbrook, K. A. Ichthyosis vulgaris: identification of a defect in synthesis of filaggrin correlated with an absence of keratohyaline granules. *J. Invest. Dermatol.* **84**, 191–194 (1985).
43. Levy-Nissenbaum, E. *et al.* Hypotrichosis simplex of the scalp is associated with nonsense mutations in CDSN encoding corneodesmosin. *Nature Genet.* **34**, 151–153 (2003).
44. Oji, V. *et al.* Loss of corneodesmosin leads to severe skin barrier defect, pruritus, and atopy: unraveling the peeling skin disease. *Am. J. Hum. Genet.* **87**, 274–281 (2010).
45. Chavanas, S. *et al.* Mutations in SPINK5, encoding a serine protease inhibitor, cause Netherton syndrome. *Nature Genet.* **25**, 141–142 (2000).
46. Huber, M. *et al.* Mutations of keratinocyte transglutaminase in lamellar ichthyosis. *Science* **267**, 525–528 (1995).
47. Russell, L. J. *et al.* Mutations in the gene for transglutaminase 1 in autosomal recessive lamellar ichthyosis. *Nature Genet.* **9**, 279–283 (1995).
48. Parmentier, L. *et al.* Autosomal recessive lamellar ichthyosis: identification of a new mutation in transglutaminase 1 and evidence for genetic heterogeneity. *Hum. Mol. Genet.* **4**, 1391–1395 (1995).
49. Suga, Y. *et al.* Transgenic mice expressing a mutant form of loricrin reveal the molecular basis of the skin diseases, Vohwinkel syndrome and progressive symmetric erythrokeratoderma. *J. Cell Biol.* **151**, 401–412 (2000).
50. Ishida-Yamamoto, A. *et al.* The molecular pathology of progressive symmetric erythrokeratoderma: a frameshift mutation in the loricrin gene and perturbations in the cornified cell envelope. *Am. J. Hum. Genet.* **61**, 581–589 (1997).
51. Hu, Z. *et al.* Mutations in ATP2C1, encoding a calcium pump, cause Hailey-Hailey disease. *Nature Genet.* **24**, 61–65 (2000).
52. Sakuntabhai, A., Burge, S., Monk, S. & Hovnanian, A. Spectrum of novel ATP2A2 mutations in patients with Darier's disease. *Hum. Mol. Genet.* **8**, 1611–1619 (1999).
53. Leigh, I. M. *et al.* Type VII collagen is a normal component of epidermal basement membrane, which shows altered expression in recessive dystrophic epidermolysis bullosa. *J. Invest. Dermatol.* **90**, 639–642 (1988).
54. Siegel, D. H. *et al.* Loss of kindlin-1, a human homolog of the *Caenorhabditis elegans* actin-extracellular-matrix linker protein UNC-112, causes Kindler syndrome. *Am. J. Hum. Genet.* **73**, 174–187 (2003).
55. Gache, Y. *et al.* Defective expression of plectin/HD1 in epidermolysis bullosa simplex with muscular dystrophy. *J. Clin. Invest.* **97**, 2289–2298 (1996).
